# Supplementary material
Source: PubMed Central journal article supplement (PMC4060691)
Supplement: 1400352111_pnas.201400352SI.pdf [file 1400352111_pnas.201400352SI.pdf]

# Supporting Information

Ankomah and Levin 10.1073/pnas.1400352111

## SI Text

**1. The Null Case (Fig. S1).** In the absence of an immune response and antibiotic treatment, the infecting bacterial population grows until its density is limited by the availability of resources (Fig. S1A). Under these conditions, the susceptible bacteria grow to densities that are high enough to produce a substantial density of refuge bacteria ( $BP_1$ ). Intermediate-resistant bacteria ( $B_2$ ) are generated but do not ascend due to resource restriction. With the parameters used, regardless of whether immune action is pathogen density-dependent (PDD) (Fig. S1B) or pathogen density-independent (PDI) (Fig. S1C), the innate immune response alone does not clear the infection over the 20-d period of the simulation.

**2. Dosing Frequency (Fig. S2).** In Fig. S2, we illustrate the dynamics of clearance with the same total dose of an antibiotic adminis-

tered once daily (Fig. S2A) and when the administration of the drug is partitioned into eight equally spaced treatments daily (Fig. S2B).

**3. Treatment Hiatuses (Fig. S3).** In the body of the report, we note that, as the model is now developed, there are situations involving treatment hiatuses at “intermediate” density thresholds for adaptive treatment regimens that increase the term of and may prevent the clearance of normally self-limiting infections.

**4. Pre-existing high level resistance and PDI immune dynamics (Fig. S4).** In Fig. S4, we illustrate the dynamics of an infection with a minority population of resistant cells present before the initiation of therapy, and for which the immune response is pathogen density-independent.

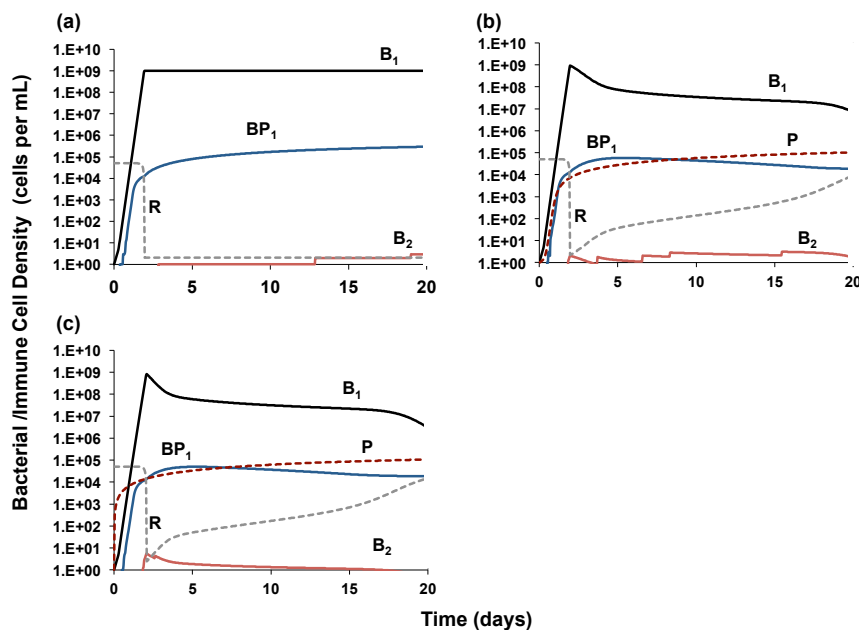

**Fig. S1.** Bacterial population dynamics of a self-limited infection with immune action and antibiotic treatment. Changes in the densities of the bacteria ( $B_1$ , antibiotic-susceptible, undergoing active growth;  $B_2$ , intermediate-resistant, undergoing active growth;  $BP_1$ , refuge bacteria), resources ( $R$ ), and immune cells ( $P$ , innate immune cells) under the following conditions: (A) no immune response, no antibiotic treatment; (B) pathogen density-dependent (PDD) innate immune response; (C) pathogen density-independent (PDI) innate immune response. The parameter values used for the simulations are listed in Table S1.

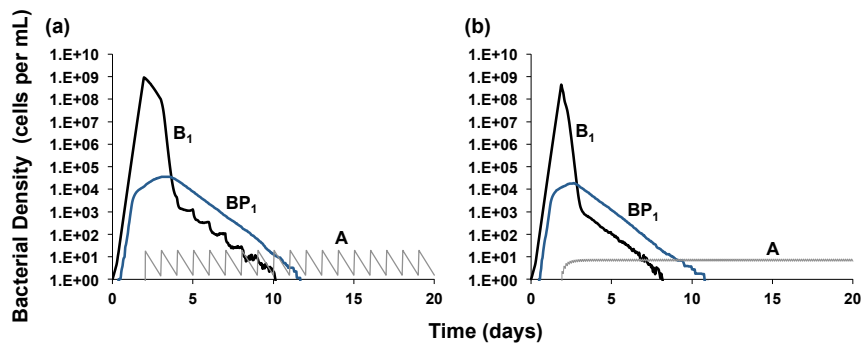

**Fig. S2.** Bacterial population dynamics of a self-limited infection with different frequencies of administration of a constant total daily dose. Changes in the densities of the bacteria ( $B_1$ ,  $BP_1$ ) and antibiotics ( $A$ ) under the following conditions: (A) one antibiotic dose of  $20 \mu\text{g/mL}$  per day; (B) eight doses of  $2.5 \mu\text{g/mL}$  per day. The parameter values used for the simulations are listed in Table S1.

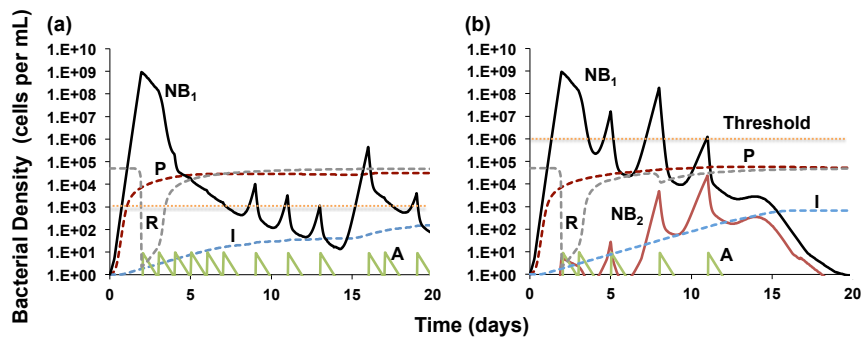

**Fig. S3.** Bacterial population dynamics of a self-limited infection with adaptive treatment regimens. Changes in the densities of the bacteria ( $NB_1 = B_1 + BP_1$ ,  $NB_2 = B_2 + BP_2$ ) under the following conditions: (A) adaptive treatment threshold,  $10^3$  bacteria per mL; (B) adaptive treatment threshold,  $10^6$  bacteria per mL. The parameter values used for the simulations are listed in Table S1.

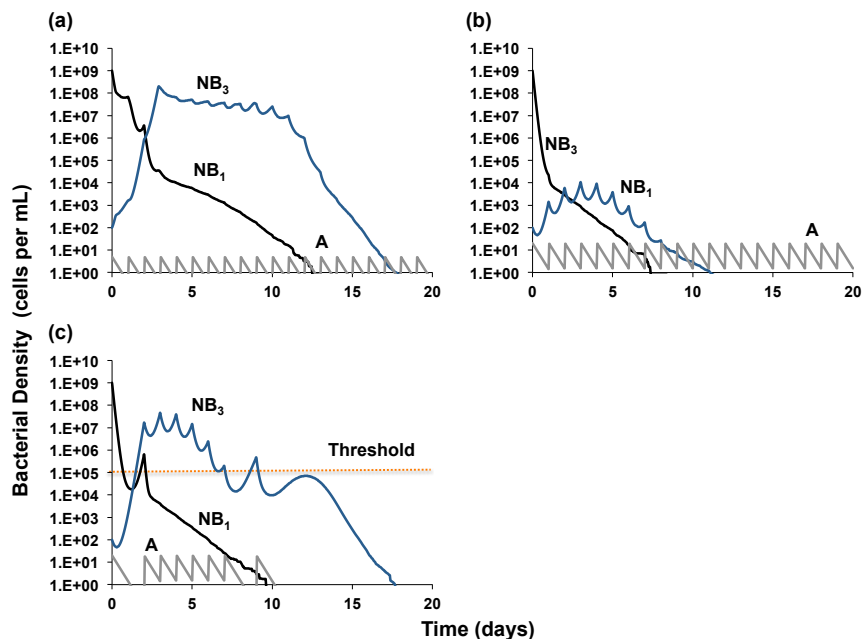

**Fig. S4.** Bacterial population dynamics of a self-limited infection with preexisting high-level resistant bacteria and PDI immune dynamics. Changes in the densities of the bacteria ( $NB_1 = B_1 + BP_1$ ,  $NB_2 = B_2 + BP_2$ ,  $NB_3 = B_3 + BP_3$ ) under the following conditions: (A) dose of  $5 \mu\text{g/mL}$ ; (B) dose of  $20 \mu\text{g/mL}$ ; (C) dose of  $20 \mu\text{g/mL}$ , adaptive treatment threshold of  $10^5$  bacteria per mL. The parameter values used for the simulations are listed in Table S1.

**Table S1. Values and ranges for variables and parameters used for generating numerical solutions to the model**

| Variable/parameter | Description                                                                                                                                                            | Value or range considered*†         |
|--------------------|------------------------------------------------------------------------------------------------------------------------------------------------------------------------|-------------------------------------|
| <b>Variables</b>   |                                                                                                                                                                        |                                     |
| $A$                | Antibiotic concentration, $\mu\text{g/mL}$                                                                                                                             | 0–40 [10]                           |
| $B_i$              | Density of bacteria, cells per mL; population wholly susceptible to antibiotic action, $i = 1$ ; intermediate resistance, $i = 2$ ; high-level resistance, $i = 3$ .   | 1– $10^{10}$                        |
| $BP_i$             | Density of persisters, cells per mL; population wholly susceptible to antibiotic action, $i = 1$ ; intermediate resistance, $i = 2$ ; high-level resistance, $i = 3$ . | 1– $10^{10}$                        |
| $R$                | Concentration of the limiting resource, $\mu\text{g/mL}$                                                                                                               | 0–500                               |
| <b>Parameters</b>  |                                                                                                                                                                        |                                     |
| $V_{iMAX}$         | Maximum hourly growth rate of replicating bacteria                                                                                                                     | 0.5 (1)                             |
| $V_{iMIN}$         | Maximum hourly death rate generated by the antibiotic                                                                                                                  | –0.75 (1)                           |
| $S_2, S_3$         | Fitness costs of resistance; assessed as decreases in maximum hourly growth rate for $B_2$ and $B_3$ populations                                                       | 0–0.025 [0] (2)                     |
| $V_{Pi}$           | Maximum hourly growth rate of persisters                                                                                                                               | 0.001‡                              |
| $MIC_i$            | Minimum inhibitory concentration of antibiotic $A$ for population $B_i$ , $\mu\text{g/mL}$                                                                             | 1, 2, 10, respectively <sup>§</sup> |
| $\kappa$           | Hill coefficient                                                                                                                                                       | 1 (3)                               |
| $w$                | Hourly washout rate, rapidly replicating bacteria                                                                                                                      | 0.2 (4)                             |
| $w_2$              | Hourly washout rate, persisters                                                                                                                                        | 0.001¶                              |
| $f_{SP}$           | Hourly rate at which $B_i$ is converted into $BP_i$                                                                                                                    | 0.005 (1, 5)                        |
| $f_{PS}$           | Hourly rate at which $BP_i$ is converted into $B_i$                                                                                                                    | 0.05 (1, 5)                         |
| $C$                | Reservoir resource concentration, $\mu\text{g/mL}$                                                                                                                     | 500 (4, 6)                          |
| $e$                | Efficiency of resource conversion into cells, $\mu\text{g/cell}$                                                                                                       | $5 \times 10^{-7}$ (6)              |
| $k$                | Concentration of resource at half-maximal growth, $\mu\text{g/mL}$                                                                                                     | 1 (6)                               |
| $A_{max}$          | Antibiotic concentration added at each dosing period, $\mu\text{g/mL}$                                                                                                 | 0–40 [10] (7, 8)                    |
| $d$                | Antibiotic decay rate, $\text{h}^{-1}$                                                                                                                                 | 0.1 (9)                             |
| $T$                | Time between doses, h                                                                                                                                                  | 3–24 [24] (7, 8)                    |
| $\mu_1, \mu_2$     | Mutation rate, mutations per cell division                                                                                                                             | $10^{-8}, 10^{-9}$ (10)             |
| $k_i$              | Rate constant for adaptive immune-mediated clearance of replicating populations                                                                                        | $5 \times 10^{-4}$   **             |
| $k_p$              | Rate constant for innate immune-mediated clearance of replicating populations                                                                                          | $5 \times 10^{-6}$ **               |
| $j_i$              | Rate constant for adaptive immune-mediated clearance of persister populations                                                                                          | $5 \times 10^{-5}$   **             |
| $j_p$              | Rate constant for innate immune-mediated clearance of persister populations                                                                                            | $5 \times 10^{-8}$ **               |
| $\eta$             | Rate of innate immune cell recruitment                                                                                                                                 | $3 \times 10^{-4}$ ††               |
| $P_{MAX}$          | Innate immune reservoir, cells per mL                                                                                                                                  | $10^{6}$ ††                         |
| $\gamma$           | Rate of innate immune cell inactivation                                                                                                                                | $10^{-3}$ ††                        |
| $\alpha$           | Rate of increase, adaptive immune cells                                                                                                                                | 0.01††                              |
| $\delta_i$         | Saturation density, adaptive immune cells                                                                                                                              | $10^3$ ††                           |
| $\sigma_i$         | Bacterial density at which adaptive immune response is at half-maximum activity, cells per mL                                                                          | $10^3$   **                         |
| $\sigma_p$         | Constant that reflects the relationship between rate of recruitment of innate immune cells and bacterial density, cells per mL                                         | $10^4$ **                           |

\*When a range is considered, the values in brackets are the standard values used for numerical analysis of the model. Save for simulations in which parameters are varied, unless otherwise stated, the standard parameter values are used for all simulations.

†Where available, parameters used are within the range for *Escherichia coli* and *Staphylococcus aureus* and antibiotics used to treat infections with these organisms. However, the parameters are not specific for any antibiotic–species combination.

‡We use this very low growth rate to approximate the minimal to no-growth rate exhibited by persisters and other bacteria in physiological or spatial refuges.

§These values are within the range of clinical MIC breakpoints used for classifying bacteria as susceptible, intermediate-resistant, or fully (high-level) resistant to an antibiotic. See [www.eucast.org/clinical\\_breakpoints/](http://www.eucast.org/clinical_breakpoints/).

¶This low washout rate is used to approximate the relative stability of bacteria in spatial refuges.

||As in ref. 11, we assume that the adaptive immune cells need to be at high densities to control the infection. Thus, we assume that the clearance rate constant,  $k_i$ , is less than the initial density of adaptive immune cells. In addition, we assume that the bacterial density at which the specific immune response grows at one-half its maximum rate will be intermediate between the initial bacterial density and the saturation density; i.e.,  $k_i, j_i \ll 1 \ll \sigma_i \ll$  bacterial saturation density.

\*\*We also assume that antigens that elicit specific immune responses are present at higher densities on bacterial surfaces than those that generate nonspecific (innate) responses (12), and that the adaptive immune response exhibits more effective bactericidal activity than the innate immune response; i.e.,  $\sigma_i < \sigma_p$ , and  $k_i > k_p, j_i > j_p$ .

††These immune parameter values were chosen to generate an infection that would be self-limiting over a 20-d period.

‡‡To facilitate comparison between simulations with PDD and PDI immune dynamics, this parameter value for PDI dynamics was chosen to approximate the maximum density of the adaptive immune cells under PDD dynamics in the null case of no antibiotic treatment.

- Ankomah P, Johnson PJ, Levin BR (2013) The pharmacology, population and evolutionary dynamics of multi-drug therapy: experiments with *S. aureus* and *E. coli* and computer simulations. *PLoS Pathog* 9(4):e1003300.
- Levin BR, Perrot V, Walker N (2000) Compensatory mutations, antibiotic resistance and the population genetics of adaptive evolution in bacteria. *Genetics* 154(3):985–997.
- Regoes RR, et al. (2004) Pharmacodynamic functions: A multiparameter approach to the design of antibiotic treatment regimens. *Antimicrob Agents Chemother* 48(10):3670–3676.
- Udekwe KI, Levin BR (2012) *Staphylococcus aureus* in continuous culture: A tool for the rational design of antibiotic treatment protocols. *PLoS One* 7(7):e38866.
- Johnson PJ, Levin BR (2013) Pharmacodynamics, population dynamics, and the evolution of persistence in *Staphylococcus aureus*. *PLoS Genet* 9(1):e1003123.
- Levin BR, Stewart FM, Chao L (1977) Resource-limited growth, competition, and predation: A model and experimental studies with bacteria and bacteriophage. *Am Nat* 111(977):3–24.
- File TM (2014) Treatment of community-acquired pneumonia in adults in the outpatient setting. *UpToDate*, ed Basow DSE (UpToDate, Waltham, MA).
- Hooton TM, Gupta K (2014) Acute uncomplicated cystitis and pyelonephritis in women. *UpToDate*, ed Basow DSE (UpToDate, Waltham, MA).

9. Potel G, et al. (1991) Single daily dosing of antibiotics: Importance of in vitro killing rate, serum half-life, and protein binding. *Antimicrob Agents Chemother* 35(10):2085–2090.
10. Komp Lindgren P, Karlsson A, Hughes D (2003) Mutation rate and evolution of fluoroquinolone resistance in *Escherichia coli* isolates from patients with urinary tract infections. *Antimicrob Agents Chemother* 47(10):3222–3232.
11. Antia R, Levin BR, May RM (1994) Within-host population-dynamics and the evolution and maintenance of microparasite virulence. *Am Nat* 144(3):457–472.
12. Antia R, Nowak MA, Anderson RM (1996) Antigenic variation and the within-host dynamics of parasites. *Proc Natl Acad Sci USA* 93(3):985–989.
